# Supplementary material for: miRandola: Extracellular Circulating MicroRNAs Database
Source: PubMed Central journal article supplement (PMC3477145; doi:10.1371/journal.pone.0047786), 2012-10-19
Supplement: pone.0047786.s001.pdf [file pone.0047786.s001.pdf]

miRandola is manually curated by extracting information from the following scientific results:

| #  | First Author             | Journal                                    | PubMed ID | Date of Publication |
|----|--------------------------|--------------------------------------------|-----------|---------------------|
| 1  | Goren Y et al.           | Eur J Heart Fail. 14(2):147-54             | 22120965  | 2012                |
| 2  | Hennessey PT et al.      | PLoS ONE 7(2): e32307.                     | 22389695  | 2012                |
| 3  | Zhu HT et al.            | Mol Biotechnol. 50(1):49-56.               | 21567136  | 2012                |
| 4  | Tomimaru Y et al.        | J Hepatol. 56(1):167-75.                   | 21749846  | 2012                |
| 5  | Wang LG et al.           | Cancer Epidemiol. 36(1):e61-7.             | 22018950  | 2012                |
| 6  | Liu H et al.             | Cancer Lett. 316(2):196-203.               | 22169097  | 2012                |
| 7  | Song J et al.            | Dig Dis Sci. 57(4):897-904.                | 22198701  | 2012                |
| 8  | Yu J et al.              | J Cancer Res Clin Oncol. 138(4):671-4.     | 22237456  | 2012                |
| 9  | Schwarzenbach H et al.   | Breast Cancer Res Treat.                   | 22350790  | 2012                |
| 10 | Zhao Z et al.            | Clin Chem.                                 | 22395025  | 2012                |
| 11 | Tsai KW et al.           | Genes Chromosomes Cancer. 51(4):394-401.   | 22420029  | 2012                |
| 12 | Ding X et al.            | Mol Med Report. 5(6):1428-32.              | 22427142  | 2012                |
| 13 | Huang JJ et al.          | Med Oncol.                                 | 22447484  | 2012                |
| 14 | Yu S et al.              | J Clin Endocrinol Metab.                   | 22472564  | 2012                |
| 15 | Chen ZH et al.           | Prostate. doi: 10.1002/pros.22495.         | 22298030  | 2012                |
| 16 | Bryant RJ et al.         | Br J Cancer. 106(4):768-74.                | 22240788  | 2012                |
| 17 | van Schooneveld E et al. | Breast Cancer Res. 14(1):R34.              | 22353773  | 2012                |
| 18 | Siegel SR et al.         | Mol Biol Rep. 39(5):6219-25.               | 22231906  | 2012                |
| 19 | Wang B et al.            | J Cancer Res Clin Oncol.                   | 22638884  | 2012                |
| 20 | Roth C et al.            | PLoS One. 7(6):e38248.                     | 22675530  | 2012                |
| 21 | Long G et al.            | Int J Biol Sci. 8(6):811-8.                | 22719221  | 2012                |
| 22 | Gallo A et al.           | PLoS One. 7(3):e30679.                     | 22427800  | 2012                |
| 23 | Yang C et al.            | Int J Cancer. doi:10.1002/ijc.27657.       | 22674182  | 2012                |
| 24 | Zahm AM et al.           | J Pediatr Gastroenterol Nutr.              | 22732895  | 2012                |
| 25 | Cookson VJ et al.        | Cell Oncol (Dordr).                        | 22821209  | 2012                |
| 26 | Martino F et al.         | PLoS One. 7(6): e38269.                    | 22715378  | 2012                |
| 27 | Rong H et al.            | J Psychiatr Res. 45(1):92-5.               | 20546789  | 2011                |
| 28 | Gui J et al.             | Clin Sci (Lond). 120(5):183-93.            | 20815808  | 2011                |
| 29 | Asaga S et al.           | Clin Chem. 57(1):84-91                     | 21036945  | 2011                |
| 30 | Xu J et al.              | Mol Carcinog. 50(2):136-42.                | 21229610  | 2011                |
| 31 | Kanemaru H et al         | J Dermatol Sci. 61(3):187-93.              | 21273047  | 2011                |
| 32 | Wang G et al.            | Lupus. 20(5):493-500.                      | 21372198  | 2011                |
| 33 | Arroyo JD et al.         | PNAS 108(12):5003-8                        | 21383194  | 2011                |
| 34 | Roth C et al.            | Mol Oncol. 5(3):281-91.                    | 21398193  | 2011                |
| 35 | Cheng H et al.           | PLoS One.6(3):e17745.                      | 21445232  | 2011                |
| 36 | Moussay E et al.         | PNAS 108(16):6573-8                        | 21460253  | 2011                |
| 37 | McDonald JS et al.       | Clin Chem. 57(6):833-40                    | 21487102  | 2011                |
| 38 | Zahm AM et al.           | J Pediatr Gastroenterol Nutr. 53(1):26-33. | 21546856  | 2011                |
| 39 | Turchinovich A et al.    | Nucleic Acids Res. 39 (16): 7223-7233.     | 21609964  | 2011                |
| 40 | Li S et al.              | Circulation. 124(2):175-84.                | 21690488  | 2011                |
| 41 | Duttagupta R et al.      | PLoS ONE 6(6): e20769.                     | 21698099  | 2011                |
| 42 | Gidlöf O et al.          | Cardiology. 118(4):217-26.                 | 21701171  | 2011                |
| 43 | Gonzales JC et al.       | Clin Genitourin Cancer. 9(1):39-45.        | 21723797  | 2011                |
| 44 | Cermelli S et al.        | PLoS One.6(8):e23937                       | 21886843  | 2011                |
| 45 | Xiao J et al.            | J Transl Med. 9:159.                       | 21943159  | 2011                |
| 46 | Wulfken LM et al.        | PLoS One. 6(9):e25787.                     | 21984948  | 2011                |
| 47 | Mittelbrunn M et al.     | Nat Commun. 2:282.                         | 21505438  | 2011                |
| 48 | Rupp AK et al.           | Gynecol Oncol. 122(2):437-46.              | 21601258  | 2011                |
| 49 | Bihrer V et al.          | PLoS ONE 6(10): e26971.                    | 22066022  | 2011                |
| 50 | Silva J et al.           | Eur Respir J. 37(3):617-23.                | 20595154  | 2011                |
| 51 | Oyama R et al.           | J Dermatol Sci. 61(3):209-11.              | 21277746  | 2011                |

|    |                        |                                          |          |      |
|----|------------------------|------------------------------------------|----------|------|
| 52 | Wei J et al.           | Chin J Cancer. 30(6):407-14.             | 21627863 | 2011 |
| 53 | Baggish AL et al.      | J Physiol. 589(Pt 16):3983-94.           | 21690193 | 2011 |
| 54 | Shen J et al.          | BMC Cancer. 11:374.                      | 21864403 | 2011 |
| 55 | Wang Y et al.          | Nat Nanotechnol. 6(10):668-74.           | 21892163 | 2011 |
| 56 | De Rosa S et al.       | Circulation. 124(18):1936-44.            | 21969012 | 2011 |
| 57 | Cui L et al.           | PLoS One. 6(11):e27071.                  | 22087245 | 2011 |
| 58 | Gunel T et al.         | Genet Mol Res. 10(4).                    | 22095477 | 2011 |
| 59 | Tutarel O et al.       | Int J Cardiol.                           | 22188991 | 2011 |
| 60 | Jung EJ et al.         | Cancer.                                  | 22370716 | 2011 |
| 61 | Yang Q et al.          | Clin Chim Acta. 412(23-24):2167-73.      | 21840305 | 2011 |
| 62 | Ge Q et al.            | Clin Chim Acta. 412(21-22):1989-94.      | 21806976 | 2011 |
| 63 | Vickers KC et al.      | Nat Cell Biol. 13(4):423-33.             | 21423178 | 2011 |
| 64 | Huang Z et al.         | Int J Cancer. 127(1):118-26.             | 19876917 | 2010 |
| 65 | Ai J et al.            | Biochem Biophys Res Commun.391(1):73-7.  | 19896465 | 2010 |
| 66 | Wang GK et al.         | Eur Heart J. 31(6):659-66.               | 20159880 | 2010 |
| 67 | Cheng Y et al.         | Clin Sci (Lond). 119(2):87-95.           | 20218970 | 2010 |
| 68 | Tsujiura M et al.      | Br J Cancer. 102(7):1174-9               | 20234369 | 2010 |
| 69 | Li A et al.            | Cancer Res. 70(13):5226-37               | 20551052 | 2010 |
| 70 | Fichtlscherer S et al. | Circ Res. 107(5):677-84.                 | 20595655 | 2010 |
| 71 | Miyachi M et al.       | Biochem Biophys Res Commun. 400(1):89-93 | 20696132 | 2010 |
| 72 | Weber JA et al.        | Clin Chem. 56(11):1733-41.               | 20847327 | 2010 |
| 73 | Redell JB et al.       | J Neurotrauma. 27(12):2147-56.           | 20883153 | 2010 |
| 74 | Corsten MF et al.      | Circ Cardiovasc Genet. 3(6):499-506.     | 20921333 | 2010 |
| 75 | Zhang Y et al.         | Clin Chem. 56(12):1830-8.                | 20930130 | 2010 |
| 76 | Roth C et al.          | Breast Cancer Res. 12(6):R90.            | 21047409 | 2010 |
| 77 | Guo HQ et al.          | Dis Markers. 29(5):251-8.                | 21206010 | 2010 |
| 78 | Ohshima K et al.       | PLoS One.5(10):e13247.                   | 20949044 | 2010 |
| 79 | Ho AS et al.           | Transl Oncol. 3(2):109-13.               | 20360935 | 2010 |
| 80 | Zampetaki A et al.     | Circ Res. 107(6):810-7.                  | 20651284 | 2010 |
| 81 | Pigati L et al.        | PLoS One. 5(10):e13515.                  | 20976003 | 2010 |
| 82 | Hanke M et al.         | Urol Oncol. 28(6):655-61.                | 19375957 | 2010 |
| 83 | Zhu W et al.           | BMC Res Notes. 2:89                      | 19454029 | 2009 |
| 84 | Rabinowits G et al.    | Clin Lung Cancer. 10(1):42-6.            | 19289371 | 2009 |
| 85 | Chim SS et al.         | Clin Chem. 54(3):482-90                  | 18218722 | 2008 |
| 86 | Gilad S et al.         | PLoS One. 3(9):e3148                     | 18773077 | 2008 |
| 87 | Mitchell PS et al.     | PNAS 105(30):10513-8                     | 18663219 | 2008 |
| 88 | Taylor DD et al.       | Gynecol Oncol.110(1):13-21.              | 18589210 | 2008 |
| 89 | Hunter MP et al.       | PLoS One. 3(11):e3694.                   | 19002258 | 2008 |
